# Supplementary material
Source: PubMed Central journal article supplement (PMC7965322)
Supplement: 4050_table.pdf [file 4050_table.pdf]

**On-line Table: Group comparisons of TBSS and ROI analyses by raters 1 and 2<sup>a</sup>**

| TBSS                                | FA        | MD        | MK        | RD        | RK        | AD        | AK |
|-------------------------------------|-----------|-----------|-----------|-----------|-----------|-----------|----|
| CC, body                            | ↓<br><.05 | ↑<br><.05 | ↓<br><.1  | ↑<br><.05 | ↓<br><.05 | ↑<br><.05 | —  |
| CC, splenium                        | ↓<br><.05 | ↑<br><.05 | —         | ↑<br><.05 | ↓<br><.1  | ↑<br><.05 | —  |
| CC, genu                            | —         | ↑<br><.05 | ↓<br><.1  | ↑<br><.05 | ↓<br><.05 | ↑<br><.05 | —  |
| OR, right                           | ↓<br><.05 | ↑<br><.05 | —         | ↑<br><.05 | ↓<br><.1  | ↑<br><.05 | —  |
| OR, left                            | ↓<br><.05 | ↑<br><.05 | —         | ↑<br><.05 | ↓<br><.1  | ↑<br><.05 | —  |
| CST, right                          | —         | —         | —         | —         | —         | —         | —  |
| CST, left                           | —         | —         | —         | —         | —         | —         | —  |
| Internal capsule, left              | ↓<br><.05 | ↑<br><.05 | —         | ↑<br><.05 | —         | ↑<br><.05 | —  |
| Internal capsule, right             | —         | ↑<br><.05 | —         | ↑<br><.05 | —         | —         | —  |
| Corona radiata, anterior            | —         | ↑<br><.05 | —         | ↑<br><.05 | ↓<br><.05 | —         | —  |
| Corona radiata, superior            | —         | ↑<br><.05 | ↓<br><.1  | ↑<br><.05 | —         | —         | —  |
| Corona radiata, posterior           | —         | ↑<br><.05 | —         | ↑<br><.05 | —         | —         | —  |
| Fronto-occipital fascicle, inferior | ↓<br><.05 | ↑<br><.05 | —         | ↑<br><.05 | —         | —         | —  |
| Longitudinal fascicle, superior     | ↓<br><.05 | ↑<br><.05 | —         | ↑<br><.05 | —         | ↑<br><.05 | —  |
| CST, L and R frontal lobe           | —         | ↑<br><.05 | —         | ↑<br><.05 | —         | ↑<br><.05 | —  |
| ROI analysis by rater 1             |           |           |           |           |           |           |    |
| CC, genu                            | —         | ↑<br>.019 | ↓<br>.036 | ↑<br>.042 | —         | ↑<br>.009 | —  |
| CC, splenium                        | —         | —         | —         | —         | ↓<br>.024 | —         | —  |
| OR, right                           | —         | ↑<br>.036 | —         | —         | —         | —         | —  |
| OR, left                            | —         | —         | ↓<br>.011 | —         | ↓<br>.028 | —         | —  |
| CST, right peduncle                 | —         | —         | ↑<br>.047 | —         | —         | —         | —  |
| CST, left peduncle                  | —         | —         | —         | —         | —         | —         | —  |
| ROI analysis by rater 2             |           |           |           |           |           |           |    |
| CC, genu                            | —         | ↑<br>.009 | —         | ↑<br>.015 | ↓<br>.043 | ↑<br>.036 | —  |
| CC, splenium                        | —         | —         | —         | —         | —         | —         | —  |
| OR, right                           | —         | —         | —         | —         | —         | —         | —  |
| OR, left                            | ↓<br>.028 | —         | ↓<br>.004 | —         | ↓<br>.011 | —         | —  |
| CST, right peduncle                 | —         | —         | ↑<br>.056 | —         | —         | —         | —  |
| CST, left peduncle                  | —         | —         | —         | —         | —         | —         | —  |

**Note:**—R indicates right; L, left; CST, corticospinal tract.

<sup>a</sup> P values in regions where the diffusion or diffusional kurtosis parameters were statistically significant ( $P < .05$ ) or presented an increased (up arrow) or decreased (down arrow) tendency ( $P < .1$ ) in patients with NMO compared with healthy controls are indicated. TBSS significance values are reported by using threshold-free cluster enhancement and are fully corrected for multiple comparisons.
